# Supplementary material
Source: ML conference proceedings conference paper supplement (https://openreview.net/forum?id=_kxlwvhOodK)
Supplement: supplementary_material [file attachment]

## A PROOF OF PROPOSITION 1

**Proposition 1.** Let  $d_{\max}(\phi) := \max_{x \sim P_{\mathcal{D}}} |\phi^T x|$ . If  $\varepsilon \geq 1 + d_{\max}(\phi)$ , then  $\Delta x = (1 + d_{\max}(\phi))\phi$  solves Eq. (4), and  $f_{\phi}(x + \Delta x) > 0 \forall x \sim G_0$ .

*Proof.* Let  $\phi$  be a data-compliant key and let  $x$  be sampled from  $P_{\mathcal{D}}$ . First, from the KKT conditions for Eq. (4) we can show that the solution  $\Delta x^*$  is proportional to  $\phi$ :

$$\Delta x^* = \phi / \mu^*, \quad (1)$$

where  $\mu^* \geq 0$  is the Lagrange multiplier. To minimize the objective, we seek  $\mu$  such that

$$1 - (x + \Delta x^*)^T \phi = 1 - x^T \phi - 1/\mu^* \leq 0, \quad (2)$$

for all  $x$ . Since  $x^T \phi < 0$  (data compliance), this requires  $1/\mu^* = 1 + d_{\max}(\phi)$ . Therefore, when  $\varepsilon \geq 1 + d_{\max}(\phi)$ ,  $\Delta x^* = (1 + d_{\max}(\phi))\phi$  solves Eq. (4). And  $f_{\phi}(x + \Delta x^*) = \phi^T(x + (1 + d_{\max}(\phi))\phi) = \phi^T x + 1 + d_{\max}(\phi) > 0$ . □

## B PROOF OF THEOREM 1

**Theorem 1.** Let  $d_{\max}(\phi) = \max_{x \in \mathcal{D}} |\phi^T x|$ ,  $\sigma^2(\phi) = \phi^T \Sigma \phi$ ,  $\delta \in [0, 1]$ , and  $\phi$  be a data-compliant key.  $D(G_{\phi}) \geq 1 - \delta/2$  if

$$\gamma \geq \sigma(\phi) \sqrt{\log \left( \frac{1}{\delta^2} \right)} + d_{\max}(\phi) - \phi^T \mu. \quad (3)$$

*Proof.* We first note that due to data compliance of keys,  $\mathbb{E}_{x \sim P_{\mathcal{D}}} [\mathbb{1}(\phi^T x < 0)] = 1$ . Therefore  $D(G_{\phi}) \geq 1 - \delta/2$  iff  $\mathbb{E}_{x \sim P_{G_{\phi}}} [\mathbb{1}(\phi^T x > 0)] \geq 1 - \delta$ , i.e.,  $\Pr(\phi^T x > 0) \geq 1 - \delta_d$  for  $x \sim P_{G_{\phi}}$ . We now seek a lower bound for  $\Pr(\phi^T x > 0)$ . To do so, let  $x$  and  $x_0$  be sampled from  $P_{G_{\phi}}$  and  $P_{G_0}$ , respectively. Then we have

$$\begin{aligned} \phi^T x &= \phi^T (x_0 + \gamma \phi + \epsilon) \\ &= \phi^T x_0 + \gamma + \phi^T \epsilon, \end{aligned} \quad (4)$$

and

$$\Pr(\phi^T x > 0) = \Pr(\phi^T \epsilon > -\phi^T x_0 - \gamma). \quad (5)$$

Since  $d_{\max}(\phi) \geq -\phi^T x_0$ , we have

$$\Pr(\phi^T x > 0) \geq \Pr(\phi^T \epsilon > d_{\max}(\phi) - \gamma) = \Pr(\phi^T (\epsilon - \mu) \leq \gamma - d_{\max}(\phi) + \phi^T \mu). \quad (6)$$

The latter sign switching in equation 6 is granted by the symmetry of the distribution of  $\phi^T (\epsilon - \mu)$ , which follows  $\mathcal{N}(0, \phi^T \Sigma \phi)$ . A sufficient condition for  $\Pr(\phi^T x > 0) \geq 1 - \delta$  is then

$$\Pr(\phi^T (\epsilon - \mu) \leq \gamma - d_{\max}(\phi) + \phi^T \mu) \geq 1 - \delta. \quad (7)$$

Recall the following tail bound of  $x \sim \mathcal{N}(0, \sigma^2)$  for  $y \geq 0$ :

$$\Pr(x \leq \sigma y) \geq 1 - \exp(-y^2/2). \quad (8)$$

Compare equation 8 with equation 7, the sufficient condition becomes

$$\gamma \geq \sigma(\phi) \sqrt{\log \left( \frac{1}{\delta^2} \right)} + d_{\max}(\phi) - \phi^T \mu. \quad (9)$$

□

## C PROOF OF THEOREM 2

**Theorem 2.** Let  $d_{\min} = \min_{x \in \mathcal{D}} |\phi^T x|$ ,  $d_{\max} = \max_{x \in \mathcal{D}} |\phi^T x|$ ,  $\sigma^2(\phi) = \|\phi\|_{\Sigma}^2$ ,  $\delta \in [0, 1]$ .  $A(\mathcal{G}) \geq 1 - N\delta$  if  $D(G) \geq 1 - \delta$  for all  $G_\phi \in \mathcal{G}$  and for any pair of data-compliant keys  $\phi$  and  $\phi'$ :

$$\phi^T \phi' \leq -1 + \frac{d_{\max}(\phi') + d_{\min}(\phi') - 2\phi'^T \mu}{\sigma(\phi') \sqrt{\log\left(\frac{1}{\delta^2}\right)} + d_{\max}(\phi') - \phi'^T \mu}. \quad (10)$$

*Proof.* Let  $\phi$  and  $\phi'$  be any pair of keys. Let  $x$  and  $x_0$  be sampled from  $P_{G_\phi}$  and  $P_{G_0}$ , respectively. We first derive the sufficient conditions for  $\Pr(\phi'^T x < 0) \geq 1 - \delta$ . Since  $x = x_0 + \gamma\phi + \epsilon$  for  $x \in G_\phi$ , we have

$$\begin{aligned} \phi'^T x &= \phi'^T (x_0 + \gamma\phi + \epsilon) \\ &= \phi'^T x_0 + \gamma\phi^T \phi' + \phi'^T \epsilon. \end{aligned} \quad (11)$$

Then

$$\begin{aligned} \Pr(\phi'^T x < 0) &= \Pr(\phi'^T \epsilon < -\phi'^T x_0 - \gamma\phi^T \phi') \\ &\geq \Pr(\phi'^T (\epsilon - \mu) < d_{\min}(\phi') - \gamma\phi^T \phi' - \phi'^T \mu), \end{aligned} \quad (12)$$

where  $d_{\min}(\phi') := \min_{x \in \mathcal{D}} |\phi'^T x|$  and  $\phi'^T (\epsilon - \mu) \sim \mathcal{N}(0, \sigma^2(\phi'))$ . Using the same tail bound of normal distribution and Theorem 1, we have  $\Pr(\phi'^T x < 0) \geq 1 - \delta$  if

$$\begin{aligned} -\gamma\phi^T \phi' &\geq \sigma(\phi') \sqrt{\log\left(\frac{1}{\delta^2}\right)} - d_{\min}(\phi') + \phi'^T \mu \\ \Rightarrow \phi^T \phi' &\leq -1 + \frac{d_{\max}(\phi') + d_{\min}(\phi') - 2\phi'^T \mu}{\sigma(\phi') \sqrt{\log\left(\frac{1}{\delta^2}\right)} + d_{\max}(\phi') - \phi'^T \mu} \end{aligned} \quad (13)$$

Note that  $\Pr(A = 1, B = 1) = 1 - \Pr(A = 0) - \Pr(B = 0) + \Pr(A = 0, B = 0) \geq 1 - \Pr(A = 0) - \Pr(B = 0)$  for binary random variables  $A$  and  $B$ . With this, it is straight forward to show that when  $\Pr(\phi'^T x < 0) \geq 1 - \delta$  for all  $\phi' \neq \phi$ , and  $\Pr(\phi^T x > 0) \geq 1 - \delta$  for all  $\phi$ , then  $\Pr(\phi^T x > 0, \phi'^T x < 0 \forall \phi' \neq \phi) \geq 1 - N\delta$  and  $A(\mathcal{G}) \geq 1 - N\delta$ . □

## D TRAINING DETAILS

### D.1 METHOD

We trained user-end models based on the objective function (Eq.(10) in the main text). For datasets where the root models follow DCGAN and PGAN, the user-end models follow the same architecture. For the FFHQ dataset where StyleGAN is used, we introduce an additional shallow convolutional network as a residual part, which is added to the original StyleGAN output to match with the perturbed datasets  $\mathcal{D}_{\gamma, \phi}$ . In this case, the training using Eq.(10) is limited to the additional shallow network, while the StyleGAN weights are frozen. More specifically, denoting the combination of convolution, ReLU, and max-pooling by Conv-ReLU-Max, the shallow network consists of three Conv-ReLU-Max blocks and one fully connected layer. All of the convolution layers have 4 x 4 kernels, stride 2, and padding 1. And all of the max-pooling layers have 3 x 3 kernels and stride 2.

### D.2 PARAMETERS

We adopt the Adam optimizer for training. Training hyper-parameters are summarized in Table 1.

Table 1: Hyper-parameters to train keys ( $\phi$ ) and generators ( $G_\phi$ ).

| GANs     | Dataset | Batch Size | Learning Rate | $\beta_1$ | $\beta_2$ | Epochs |
|----------|---------|------------|---------------|-----------|-----------|--------|
| DCGAN    | MNIST   | 16         | 0.001         | 0.9       | 0.99      | 10     |
| DCGAN    | CelebA  | 64         | 0.001         | 0.9       | 0.99      | 2      |
| StyleGAN | FFHQ    | 8          | 0.001         | 0.9       | 0.99      | 5      |

### D.3 TRAINING TIME

All experiments are conducted on V100 Tesla GPUs. Table 2 summarizes the number of GPUs used and the training time for the non-robust models (Eq.(10) in the main text) and robust models (Eq.(12) in the main text). Recall that we chose Eq.(10) for training the non-robust user-end models for consistency with the theorems, although Eq.(12) can be used to achieve attributability in practice, as is shown in the robust attribution study. Therefore, the non-robust training takes longer to due the iteration of  $\gamma$  in Alg. 1.

Table 2: Training time (in minute) of one key (Eq.(9) in main text) and one generator (Eq.(10) in main text). DCGAN<sub>M</sub>: DCGAN for MNIST, DCGAN<sub>C</sub>: DCGAN for CelebA.

| GANs               | GPUs | Key   | Non-robust | Blurring | Cropping | Noise  | JPEG   | Combination |
|--------------------|------|-------|------------|----------|----------|--------|--------|-------------|
| DCGAN <sub>M</sub> | 1    | 1.77  | 14         | 4.12     | 3.96     | 4.19   | 5.71   | 5.12        |
| DCGAN <sub>C</sub> | 1    | 5.31  | 15         | 10.33    | 9.56     | 10.35  | 10.25  | 10.76       |
| PGAN               | 2    | 50.89 | 141.07     | 140.05   | 131.90   | 133.46 | 132.46 | 135.07      |
| CycleGAN           | 1    | 20.88 | 16.04      | 16.26    | 15.43    | 15.71  | 15.98  | 16.41       |
| StyleGAN           | 1    | 54.23 | 3.12       | -        | -        | -      | -      | -           |

## E ABLATION STUDY

Here we conduct an ablation study on the hyper-parameter  $C$  for the robust training formulation (Eq.(12)). Training with larger  $C$  focuses more on generation quality, thus sacrificing distinguishability and attributability. These effects are reported in Table 3 and Table 4. Due to limited time, the results here are averaged over five models for each  $C$  and data-model pairs.

Table 3: Distinguishability (top), attributability (btm) before (Bfr) and after (Aft) robust training. DCGAN<sub>M</sub>: DCGAN for MNIST, DCGAN<sub>C</sub>: DCGAN for CelebA.

| Model              | $C$ | Blurring |             | Cropping |             | Noise |             | JPEG |             | Combination |             |
|--------------------|-----|----------|-------------|----------|-------------|-------|-------------|------|-------------|-------------|-------------|
|                    |     | Bfr      | Aft         | Bfr      | Aft         | Bfr   | Aft         | Bfr  | Aft         | Bfr         | Aft         |
| DCGAN <sub>M</sub> | 10  | 0.49     | <b>0.97</b> | 0.51     | <b>0.99</b> | 0.84  | <b>0.99</b> | 0.53 | <b>0.99</b> | 0.50        | <b>0.63</b> |
| DCGAN <sub>M</sub> | 100 | 0.49     | 0.61        | 0.51     | 0.98        | 0.76  | 0.98        | 0.53 | 0.99        | 0.50        | 0.52        |
| DCGAN <sub>M</sub> | 1K  | 0.49     | 0.50        | 0.51     | 0.81        | 0.69  | 0.91        | 0.53 | 0.97        | 0.50        | 0.51        |
| DCGAN <sub>C</sub> | 10  | 0.49     | <b>0.99</b> | 0.49     | <b>0.99</b> | 0.96  | <b>0.99</b> | 0.50 | <b>0.99</b> | 0.49        | <b>0.85</b> |
| DCGAN <sub>C</sub> | 100 | 0.50     | 0.96        | 0.49     | 0.99        | 0.92  | 0.93        | 0.50 | 0.99        | 0.49        | 0.61        |
| DCGAN <sub>C</sub> | 1K  | 0.50     | 0.62        | 0.49     | 0.97        | 0.88  | 0.91        | 0.50 | 0.99        | 0.49        | 0.51        |
| PGAN               | 100 | 0.50     | <b>0.98</b> | 0.50     | <b>0.99</b> | 0.96  | <b>0.99</b> | 0.96 | <b>0.99</b> | 0.50        | <b>0.81</b> |
| PGAN               | 1K  | 0.50     | 0.89        | 0.49     | 0.95        | 0.94  | 0.95        | 0.88 | 0.99        | 0.50        | 0.60        |
| PGAN               | 10K | 0.50     | 0.61        | 0.50     | 0.76        | 0.89  | 0.90        | 0.76 | 0.98        | 0.50        | 0.51        |
| CycleGAN           | 1K  | 0.49     | <b>0.92</b> | 0.50     | <b>0.87</b> | 0.98  | <b>0.99</b> | 0.55 | <b>0.99</b> | 0.49        | <b>0.62</b> |
| CycleGAN           | 10K | 0.49     | 0.70        | 0.50     | 0.66        | 0.94  | 0.96        | 0.52 | 0.98        | 0.50        | 0.51        |
| DCGAN <sub>M</sub> | 10  | 0.02     | <b>0.94</b> | 0.03     | <b>0.88</b> | 0.77  | <b>0.95</b> | 0.16 | <b>0.98</b> | 0.00        | <b>0.26</b> |
| DCGAN <sub>M</sub> | 100 | 0.00     | 0.87        | 0.00     | 0.85        | 0.73  | 0.90        | 0.10 | 0.95        | 0.00        | 0.13        |
| DCGAN <sub>M</sub> | 1K  | 0.00     | 0.75        | 0.00     | 0.80        | 0.63  | 0.80        | 0.10 | 0.91        | 0.00        | 0.05        |
| DCGAN <sub>C</sub> | 10  | 0.00     | <b>0.98</b> | 0.00     | <b>0.99</b> | 0.89  | <b>0.93</b> | 0.07 | <b>0.98</b> | 0.00        | <b>0.70</b> |
| DCGAN <sub>C</sub> | 100 | 0.00     | 0.95        | 0.00     | 0.93        | 0.82  | 0.85        | 0.02 | 0.93        | 0.00        | 0.61        |
| DCGAN <sub>C</sub> | 1K  | 0.00     | 0.90        | 0.00     | 0.89        | 0.77  | 0.81        | 0.00 | 0.88        | 0.00        | 0.43        |
| PGAN               | 100 | 0.26     | <b>1.00</b> | 0.21     | <b>1.00</b> | 0.99  | <b>0.99</b> | 0.99 | <b>0.99</b> | 0.00        | <b>0.99</b> |
| PGAN               | 1K  | 0.21     | 0.99        | 0.00     | 0.99        | 0.97  | 0.98        | 0.98 | 0.99        | 0.00        | 0.54        |
| PGAN               | 10K | 0.00     | 0.51        | 0.00     | 0.90        | 0.90  | 0.92        | 0.83 | 0.99        | 0.00        | 0.22        |
| CycleGAN           | 1K  | 0.00     | <b>0.99</b> | 0.00     | <b>0.97</b> | 0.97  | <b>0.99</b> | 0.45 | <b>0.99</b> | 0.00        | <b>0.77</b> |
| CycleGAN           | 10K | 0.00     | 0.87        | 0.00     | 0.77        | 0.95  | 0.96        | 0.30 | 0.99        | 0.00        | 0.31        |

Table 4:  $||\Delta x||$  (top) and FID score (btm). Standard deviations in parenthesis. DCGAN<sub>M</sub>: DCGAN for MNIST, DCGAN<sub>C</sub>: DCGAN for CelebA, Combi.: Combination attack. *Lower is better.*

| Model              | $C$ | Baseline           | Blurring           | Cropping            | Noise              | JPEG               | Combi.             |
|--------------------|-----|--------------------|--------------------|---------------------|--------------------|--------------------|--------------------|
| DCGAN <sub>M</sub> | 10  | 5.05(0.09)         | 15.96(2.18)        | 9.17(0.65)          | 5.93(0.34)         | 6.48(0.94)         | 17.08(1.86)        |
| DCGAN <sub>M</sub> | 100 | 4.09(0.53)         | 12.95(4.47)        | 7.62(1.55)          | 4.57(0.78)         | 4.70(1.02)         | 12.70(3.37)        |
| DCGAN <sub>M</sub> | 1K  | <b>3.88(0.60)</b>  | <b>7.17(2.10)</b>  | <b>7.43(1.37)</b>   | <b>4.22(0.77)</b>  | <b>5.12(1.94)</b>  | <b>7.56(1.41)</b>  |
| DCGAN <sub>C</sub> | 10  | 5.63(0.11)         | 11.83(0.65)        | 9.30(0.31)          | 4.75(0.17)         | 6.01(0.29)         | 13.69(0.59)        |
| DCGAN <sub>C</sub> | 100 | 3.08(0.27)         | 10.00(1.61)        | 7.80(0.58)          | 3.20(0.45)         | 4.26(0.59)         | 11.65(1.48)        |
| DCGAN <sub>C</sub> | 1K  | <b>2.55(0.36)</b>  | <b>7.68(1.53)</b>  | <b>7.13(0.47)</b>   | <b>2.65(0.24)</b>  | <b>3.39(0.58)</b>  | <b>9.23(1.22)</b>  |
| PGAN               | 100 | 9.29(0.95)         | 18.49(2.04)        | 21.27(0.81)         | 10.20(0.81)        | 10.08(1.03)        | 24.82(2.33)        |
| PGAN               | 1K  | 6.52(1.85)         | 14.79(4.15)        | 18.88(1.96)         | 6.40(1.48)         | 7.09(1.62)         | 22.09(2.12)        |
| PGAN               | 10K | <b>5.04(1.63)</b>  | <b>10.19(2.87)</b> | <b>18.23(0.94)</b>  | <b>5.13(1.14)</b>  | <b>5.67(1.62)</b>  | <b>17.26(1.39)</b> |
| CycleGAN           | 1K  | 55.85(3.67)        | 68.03(3.62)        | 80.03(3.59)         | 55.47(1.60)        | 57.42(2.00)        | 83.94(4.66)        |
| CycleGAN           | 10K | <b>49.66(5.01)</b> | <b>58.64(3.70)</b> | <b>66.05(3.47)</b>  | <b>53.14(0.44)</b> | <b>54.52(2.30)</b> | <b>66.24(5.29)</b> |
| DCGAN <sub>M</sub> | 10  | 5.36(0.12)         | 41.11(20.43)       | 21.58(2.44)         | 5.79(0.19)         | 6.50(1.70)         | 68.16(24.67)       |
| DCGAN <sub>M</sub> | 100 | 5.32(0.11)         | 23.83(14.29)       | 18.39(3.70)         | 5.41(0.18)         | 5.46(0.11)         | 36.05(16.20)       |
| DCGAN <sub>M</sub> | 1K  | <b>5.23(0.12)</b>  | <b>10.85(4.28)</b> | <b>18.08(1.77)</b>  | <b>5.37(0.14)</b>  | <b>5.30(0.96)</b>  | <b>21.86(4.16)</b> |
| DCGAN <sub>C</sub> | 10  | 53.91(2.20)        | 73.62(6.70)        | 98.86(9.51)         | 59.51(1.60)        | 60.35(2.57)        | 87.29(9.29)        |
| DCGAN <sub>C</sub> | 100 | 45.02(3.37)        | 73.12(11.03)       | 85.50(12.25)        | 47.60(2.57)        | 50.48(4.58)        | 78.11(12.95)       |
| DCGAN <sub>C</sub> | 1K  | <b>40.85(3.41)</b> | <b>55.63(7.97)</b> | <b>72.11(13.81)</b> | <b>40.87(3.03)</b> | <b>45.46(5.03)</b> | <b>57.13(7.20)</b> |
| PGAN               | 100 | 21.62(1.73)        | 28.15(3.43)        | 47.94(5.71)         | 25.43(2.19)        | 22.86(2.06)        | 45.16(7.87)        |
| PGAN               | 1K  | 19.05(3.14)        | 25.19(5.26)        | 43.48(12.24)        | 19.20(2.96)        | 19.05(2.82)        | 35.07(8.72)        |
| PGAN               | 10K | <b>16.75(1.87)</b> | <b>18.96(2.65)</b> | <b>37.01(8.74)</b>  | <b>16.94(1.89)</b> | <b>17.39(2.33)</b> | <b>26.63(4.44)</b> |
